# Supplementary material
Source: publisher site journal article supplement (https://www.dovepress.com/article/454193)
Supplement: Supplementary file 1 [file get_supplementary_file.php]

M 1 2 3 4 5 6 7 8 9

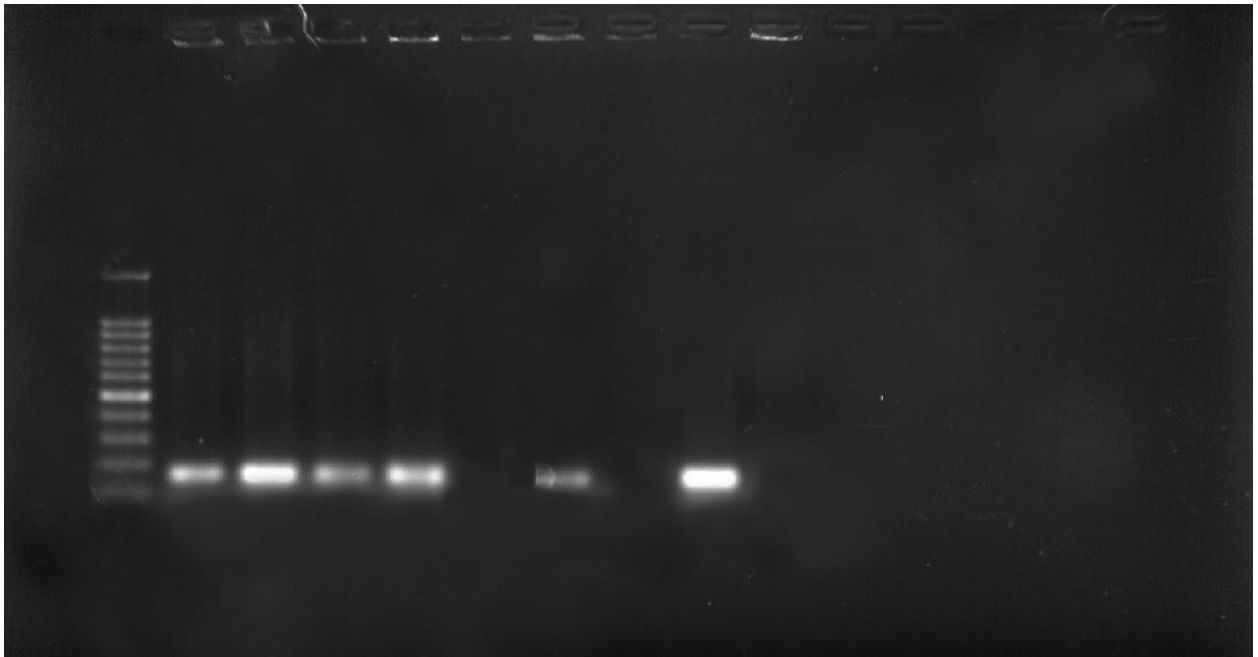

M 1 2 3 4 5 6 7 8 9

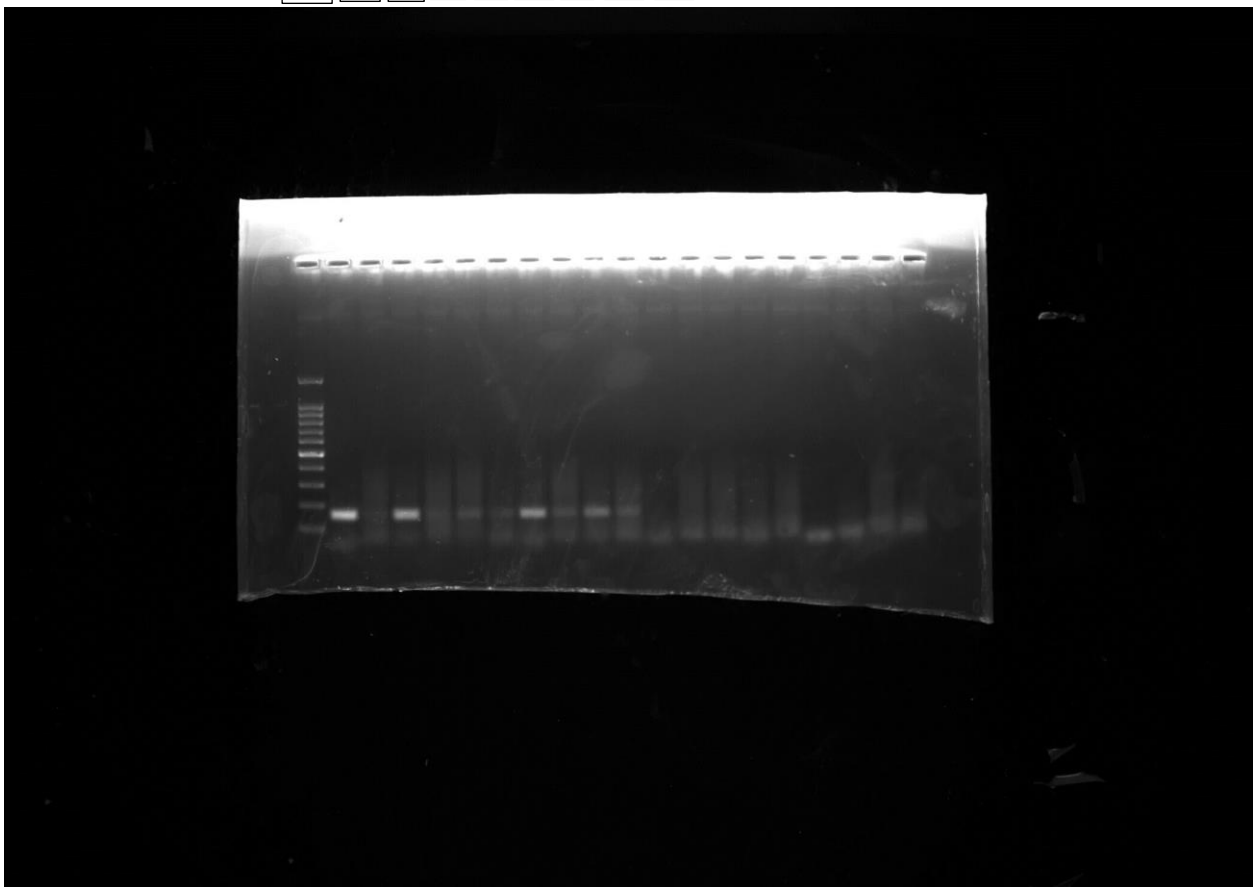

|   |   |   |   |   |   |   |   |   |   |
|---|---|---|---|---|---|---|---|---|---|
| M | 1 | 2 | 3 | 4 | 5 | 6 | 7 | 8 | 9 |
|---|---|---|---|---|---|---|---|---|---|

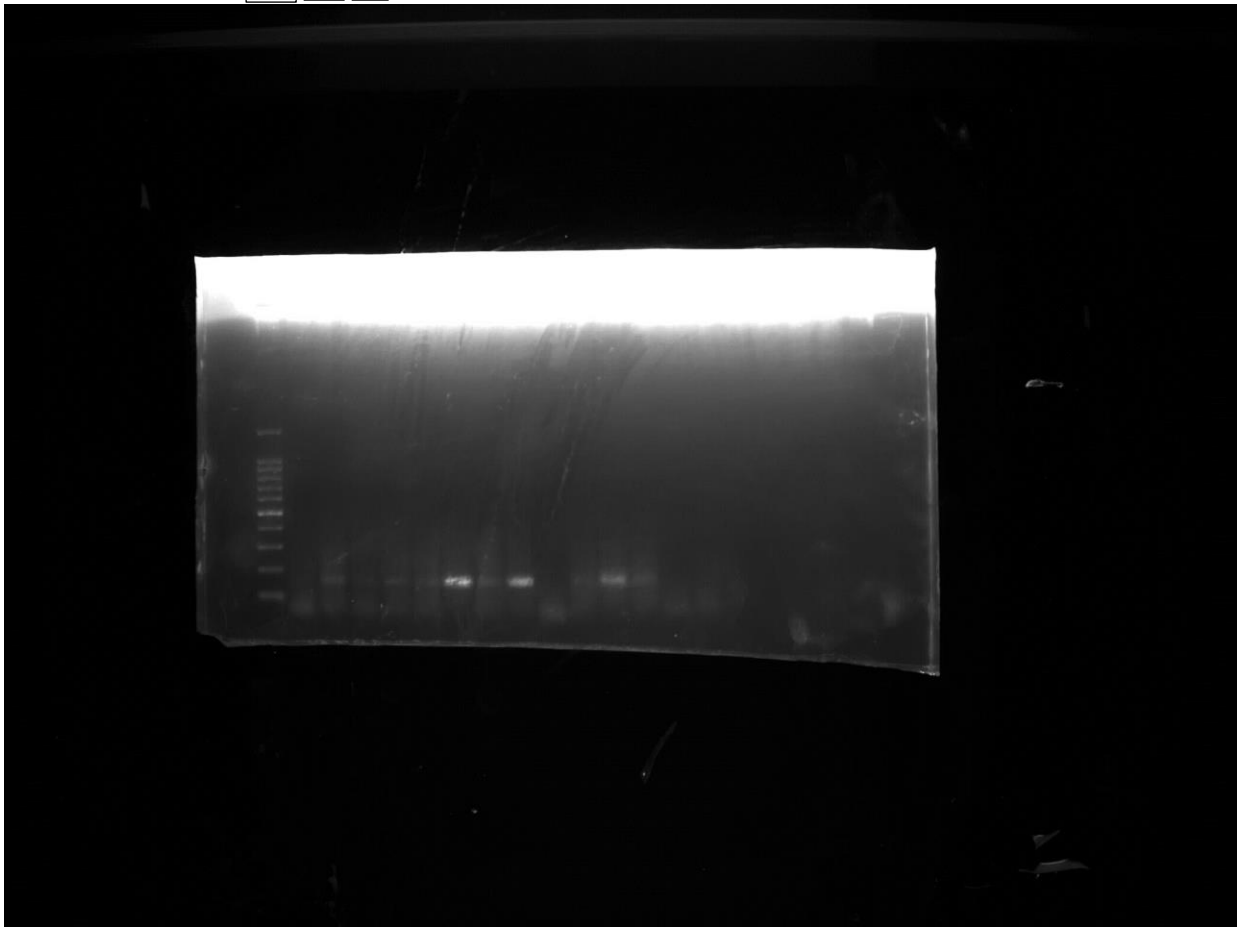

**Figure S1. Representative Agarose gel electrophoresis raw images of PCR amplified products. M: marker size (100bp), Lane 1: Positive control; Lane 2-8: PCR product of isolates; Lane 9: Negative control**
